# Supplementary material for: Screening and design of high-performance indoline-based dyes for DSSCs
Source: Royal Society of Chemistry journal article supplement (doi:10.1039/c6ra28396a), 2017-01-01
Supplement: c6ra28396a1.pdf [file c6ra28396a1.pdf]

## Supporting materials

---

**Table S1** HOMO, LUMO and gap energies (in eV) of dyes calculated by DFT

**Table S2.** Optimized structure (Cartesian x, y, z coordinates) for WS-2/TiO<sub>2</sub>.

**Table S3.** Optimized structure (Cartesian x, y, z coordinates) for WS-92/TiO<sub>2</sub>.

**Table S4.** Optimized structure (Cartesian x, y, z coordinates) for WS-95/TiO<sub>2</sub>.

**Table S5.** Maximum absorption wavelengths for dyes using different functionals

**Table S6.** HOMO, LUMO and gap energies (in eV) of dyes calculated by DFT

**Figure S1** The plot surface of frontier orbital of the dyes in solvent phase

**Figure S2** Absorption spectra of WS-2, WS-92 and WS-95 in gas phase

---

**Table S1**HOMO, LUMO and gap energies (in eV) of dyescalculated by DFT

---

|     | WS-2  |         |       | WS-92 |         |       | WS-95 |         |       |
|-----|-------|---------|-------|-------|---------|-------|-------|---------|-------|
|     | Gas   | Solvent |       | Gas   | Solvent |       | Gas   | Solvent |       |
|     | +TiO  |         |       | +TiO  |         |       | +TiO  |         |       |
|     | 2     |         |       | 2     |         |       | 2     |         |       |
| L+1 | -2.18 | -3.68   | -2.28 | -2.14 | -3.67   | -2.26 | -2.27 | -3.60   | -2.35 |
| L   | -2.95 | -3.70   | -3.02 | -2.91 | -3.69   | -3.00 | -2.85 | -3.62   | -2.92 |
| H   | -5.16 | -5.21   | -5.12 | -4.81 | -4.99   | -4.78 | -4.89 | -5.01   | -4.89 |
| H-1 | -5.88 | -6.14   | -5.92 | -5.59 | -5.80   | -5.61 | -5.31 | -5.51   | -5.35 |
| Gap | 2.21  | 1.51    | 2.1   | 1.90  | 1.3     | 1.78  | 2.04  | 1.39    | 1.97  |

---

**Table S2.** Optimized structure (Cartesian x, y, z coordinates) for WS-2/TiO<sub>2</sub>.

| Atom | WS-2/TiO <sub>2</sub> (Angstroms) |          |          |
|------|-----------------------------------|----------|----------|
|      | X                                 | Y        | Z        |
| C    | -14.5003                          | 10.50439 | -1.09841 |
| O    | -15.3014                          | 11.498   | -0.92884 |
| O    | -15.0846                          | 9.37175  | -1.32004 |
| Ti   | -16.903                           | 10.23774 | -1.07478 |
| O    | -17.6925                          | 9.21659  | -2.36676 |
| O    | -18.0173                          | 11.80238 | -1.35125 |
| O    | -17.4669                          | 9.60043  | 0.47103  |
| Ti   | -19.2764                          | 8.46449  | -1.88066 |
| Ti   | -19.6537                          | 12.10559 | -0.86914 |
| Ti   | -18.5831                          | 8.0742   | 1.04562  |
| O    | -20.8466                          | 8.55117  | -2.88571 |
| O    | -20.0012                          | 9.84953  | -0.88119 |
| O    | -19.0278                          | 7.25877  | -0.62361 |
| O    | -19.9873                          | 13.93382 | -0.66248 |
| O    | -21.084                           | 11.69417 | -2.10038 |
| O    | -19.51                            | 11.48059 | 1.02468  |
| O    | -17.8379                          | 7.08159  | 2.08523  |
| O    | -20.2558                          | 8.82984  | 1.73405  |
| Ti   | -21.6853                          | 9.92979  | -2.048   |
| Ti   | -21.6909                          | 14.20594 | -0.12252 |
| Ti   | -21.0656                          | 10.21058 | 1.09038  |
| H    | -18.6494                          | 11.02004 | 1.15702  |
| Ti   | -23.1338                          | 11.92918 | -1.11667 |
| O    | -23.3952                          | 10.78521 | -2.43138 |
| O    | -22.3838                          | 9.9726   | -0.30328 |
| O    | -22.8961                          | 13.81393 | -1.36412 |
| O    | -22.4875                          | 14.25372 | 1.553    |
| O    | -21.7171                          | 12.32495 | 0.25524  |
| O    | -22.1631                          | 11.02087 | 2.38147  |
| O    | -24.1987                          | 12.0682  | 0.46247  |
| Ti   | -22.9846                          | 12.46989 | 1.69562  |
| C    | 5.30769                           | 6.08539  | -2.01657 |
| C    | 5.42631                           | 7.45389  | -2.27261 |
| C    | 4.34183                           | 8.31612  | -2.10838 |
| C    | 3.06365                           | 7.86477  | -1.7184  |
| C    | 2.98498                           | 6.49196  | -1.42262 |
| C    | 4.06773                           | 5.62254  | -1.57215 |
| C    | 6.47433                           | 5.15188  | -2.2178  |

|   |          |          |          |
|---|----------|----------|----------|
| N | 1.93141  | 8.73564  | -1.59106 |
| C | 2.14323  | 10.19202 | -1.86592 |
| C | 0.87747  | 10.97454 | -1.44062 |
| C | -0.08089 | 9.84562  | -1.23349 |
| C | 0.54934  | 8.59599  | -1.29245 |
| C | 2.31753  | 10.58423 | -3.34578 |
| C | 1.78497  | 12.02192 | -3.41486 |
| C | 0.50624  | 11.94096 | -2.57353 |
| C | -1.45256 | 9.98324  | -1.03051 |
| C | -2.25816 | 8.84978  | -0.84146 |
| C | -1.61419 | 7.60095  | -0.81206 |
| C | -0.24745 | 7.46453  | -1.06137 |
| C | -3.72741 | 8.98206  | -0.69374 |
| C | -4.27565 | 10.05628 | -0.05236 |
| C | -5.70067 | 10.26897 | 0.04536  |
| C | -6.63317 | 9.41196  | -0.47759 |
| C | -6.10163 | 8.19987  | -1.10177 |
| C | -4.66417 | 8.00457  | -1.23771 |
| N | -6.82288 | 7.23201  | -1.59704 |
| S | -5.76227 | 6.14428  | -2.21567 |
| N | -4.30382 | 6.92939  | -1.88007 |
| C | -8.07101 | 9.73263  | -0.4054  |
| C | -8.64601 | 10.80798 | 0.24537  |
| C | -10.0475 | 10.92169 | 0.07825  |
| C | -10.5811 | 9.93172  | -0.71857 |
| S | -9.32065 | 8.8477   | -1.16659 |
| C | -11.9564 | 9.69258  | -1.13513 |
| C | -13.0457 | 10.49629 | -0.95176 |
| C | -12.9869 | 11.7834  | -0.31755 |
| N | -12.9482 | 12.84582 | 0.19541  |
| H | 6.3949   | 7.86105  | -2.60712 |
| H | 4.5478   | 9.37514  | -2.3136  |
| H | 2.06171  | 6.04214  | -1.04322 |
| H | 3.93969  | 4.55486  | -1.32936 |
| H | 6.13913  | 4.10393  | -2.38655 |
| H | 7.13352  | 5.16955  | -1.3206  |
| H | 7.07742  | 5.45073  | -3.10488 |
| H | 2.99327  | 10.56914 | -1.24763 |
| H | 1.03384  | 11.50517 | -0.47162 |
| H | 1.68206  | 9.92345  | -3.98239 |
| H | 3.36122  | 10.5191  | -3.72215 |
| H | 1.59631  | 12.36531 | -4.45726 |
| H | 2.51456  | 12.71929 | -2.93739 |

---

|   |          |          |          |
|---|----------|----------|----------|
| H | 0.17573  | 12.9362  | -2.19906 |
| H | -0.31243 | 11.51572 | -3.2009  |
| H | -1.88423 | 10.99514 | -1.06107 |
| H | -2.1866  | 6.68363  | -0.60363 |
| H | 0.15485  | 6.44556  | -1.08546 |
| H | -3.62417 | 10.82062 | 0.40209  |
| H | -6.00732 | 11.20505 | 0.53629  |
| H | -8.09578 | 11.55539 | 0.83254  |
| H | -10.6155 | 11.7386  | 0.53813  |
| H | -12.1195 | 8.73472  | -1.66021 |

**Table S3.**Optimized structure (Cartesian x, y, z coordinates) for WS-92/TiO<sub>2</sub>.

| Atom | WS-92/TiO <sub>2</sub> (Angstroms) |          |          |
|------|------------------------------------|----------|----------|
|      | X                                  | Y        | Z        |
| C    | 2.94985                            | -0.16183 | -1.95246 |
| C    | 2.39861                            | -1.40647 | -1.85257 |
| C    | 0.9796                             | -1.64149 | -1.96575 |
| C    | 0.06196                            | -0.64906 | -2.1877  |
| C    | 0.60424                            | 0.70172  | -2.34208 |
| C    | 2.03377                            | 0.9443   | -2.19922 |
| C    | 4.42063                            | 0.00237  | -1.87572 |
| C    | 5.09569                            | 0.88405  | -2.73629 |
| C    | 6.48599                            | 0.99408  | -2.72685 |
| C    | 7.23905                            | 0.18315  | -1.86568 |
| C    | 6.57084                            | -0.66206 | -0.97443 |
| C    | 5.18096                            | -0.76081 | -0.97421 |
| N    | -0.09896                           | 1.76842  | -2.60138 |
| S    | 0.95428                            | 3.08759  | -2.58624 |
| N    | 2.40937                            | 2.18897  | -2.30326 |
| N    | 8.6304                             | 0.06921  | -1.70637 |
| C    | 8.86002                            | -0.75251 | -0.48039 |
| C    | 7.52115                            | -1.44669 | -0.11775 |
| C    | 9.23128                            | 0.06923  | 0.77177  |
| C    | 7.96849                            | 0.12269  | 1.64324  |
| C    | 7.31525                            | -1.23909 | 1.38607  |
| C    | 9.77038                            | 0.49957  | -2.45784 |
| C    | 9.5957                             | 0.92091  | -3.80822 |
| C    | 10.6398                            | 1.33069  | -4.61778 |
| C    | 11.93867                           | 1.31438  | -4.07311 |
| C    | 12.14544                           | 0.88854  | -2.75668 |
| C    | 11.07214                           | 0.45588  | -1.95244 |
| N    | 13.19081                           | 1.6373   | -4.59018 |
| C    | 14.20592                           | 1.46297  | -3.65117 |
| C    | 13.56016                           | 0.98858  | -2.4928  |
| C    | 15.60654                           | 1.65429  | -3.63571 |
| C    | 16.30362                           | 1.3675   | -2.47328 |
| C    | 15.64438                           | 0.89017  | -1.31677 |
| C    | 14.27409                           | 0.69529  | -1.31298 |
| C    | 13.31245                           | 2.08432  | -5.98645 |
| C    | 14.66899                           | 2.13184  | -6.69906 |
| C    | 14.51328                           | 2.37533  | -8.2123  |
| C    | 15.86687                           | 2.45469  | -8.93875 |

|   |          |          |          |
|---|----------|----------|----------|
| C | 15.6974  | 2.64112  | -10.4564 |
| C | 17.04551 | 2.73272  | -11.1843 |
| C | -1.36808 | -0.98204 | -2.3179  |
| C | -1.89638 | -2.25146 | -2.45925 |
| C | -3.30952 | -2.30051 | -2.49659 |
| C | -3.89979 | -1.06112 | -2.37246 |
| S | -2.66114 | 0.1369   | -2.30269 |
| C | -5.31056 | -0.69952 | -2.37477 |
| C | -6.38796 | -1.53798 | -2.29276 |
| C | -6.28024 | -2.96088 | -2.13648 |
| N | -6.20347 | -4.13164 | -1.9988  |
| H | 3.04535  | -2.28828 | -1.71313 |
| H | 0.66338  | -2.68945 | -1.85041 |
| H | 4.54004  | 1.49061  | -3.46858 |
| H | 6.95718  | 1.72937  | -3.39291 |
| H | 4.69986  | -1.46091 | -0.27454 |
| H | 9.62564  | -1.53384 | -0.7029  |
| H | 7.48247  | -2.51826 | -0.42144 |
| H | 9.60578  | 1.08952  | 0.53114  |
| H | 10.03277 | -0.46555 | 1.33702  |
| H | 7.29462  | 0.9397   | 1.29114  |
| H | 8.19377  | 0.29437  | 2.72051  |
| H | 7.87297  | -2.0284  | 1.94544  |
| H | 6.24902  | -1.28134 | 1.70001  |
| H | 8.60912  | 0.86722  | -4.2875  |
| H | 10.46009 | 1.6281   | -5.66202 |
| H | 11.30187 | 0.10901  | -0.93594 |
| H | 16.16048 | 2.0306   | -4.50454 |
| H | 17.39551 | 1.51918  | -2.44511 |
| H | 16.2281  | 0.67564  | -0.40663 |
| H | 13.75746 | 0.32865  | -0.41293 |
| H | 12.84064 | 3.09462  | -6.03667 |
| H | 12.66999 | 1.38899  | -6.57899 |
| H | 15.19892 | 1.16142  | -6.54614 |
| H | 15.28509 | 2.95672  | -6.27064 |
| H | 13.94965 | 3.32441  | -8.37861 |
| H | 13.91031 | 1.54853  | -8.65869 |
| H | 16.4455  | 1.51989  | -8.74609 |
| H | 16.45872 | 3.30519  | -8.52398 |
| H | 15.11047 | 3.56955  | -10.6562 |
| H | 15.11583 | 1.78462  | -10.8747 |
| H | 16.89826 | 2.85861  | -12.2818 |
| H | 17.65107 | 1.81077  | -11.028  |

|    |          |          |          |
|----|----------|----------|----------|
| H  | 17.64059 | 3.60157  | -10.821  |
| H  | -1.30705 | -3.17573 | -2.52451 |
| H  | -3.84417 | -3.2509  | -2.60551 |
| H  | -5.51431 | 0.38233  | -2.45902 |
| C  | -7.82103 | -1.7076  | -2.33387 |
| O  | -8.67147 | -0.74674 | -2.22784 |
| O  | -8.3471  | -2.88062 | -2.47751 |
| Ti | -10.2071 | -2.09341 | -2.28373 |
| O  | -10.9441 | -3.23705 | -3.50201 |
| O  | -11.3994 | -0.60912 | -2.6596  |
| O  | -10.7375 | -2.65404 | -0.69689 |
| Ti | -12.4876 | -4.03434 | -2.96113 |
| Ti | -13.049  | -0.35772 | -2.19274 |
| Ti | -11.7746 | -4.19316 | -0.01794 |
| O  | -14.0605 | -4.09445 | -3.96396 |
| O  | -13.2815 | -2.62426 | -2.05338 |
| O  | -12.1778 | -5.13948 | -1.62757 |
| O  | -13.4749 | 1.46097  | -2.10694 |
| O  | -14.4569 | -0.92217 | -3.38862 |
| O  | -12.8733 | -0.84706 | -0.26207 |
| O  | -10.9796 | -5.07527 | 1.08267  |
| O  | -13.4833 | -3.479   | 0.62482  |
| Ti | -14.9678 | -2.70732 | -3.21676 |
| Ti | -15.1901 | 1.68184  | -1.58005 |
| Ti | -14.3623 | -2.18701 | -0.10631 |
| H  | -11.9903 | -1.25359 | -0.10254 |
| Ti | -16.5158 | -0.72625 | -2.41521 |
| O  | -16.7191 | -1.96705 | -3.64992 |
| O  | -15.6671 | -2.58378 | -1.47621 |
| O  | -16.3741 | 1.14745  | -2.78838 |
| O  | -15.9876 | 1.80076  | 0.0915   |
| O  | -15.1206 | -0.1687  | -1.07787 |
| O  | -15.4992 | -1.34912 | 1.13203  |
| O  | -17.5859 | -0.53641 | -0.84492 |
| Ti | -16.3934 | 0.00752  | 0.35431  |



**Table S4.**Optimized structure (Cartesian x, y, z coordinates) for WS-95/TiO<sub>2</sub>.

| Atom | WS-95/TiO <sub>2</sub> (Angstroms) |         |          |
|------|------------------------------------|---------|----------|
|      | X                                  | Y       | Z        |
| C    | 2.95539                            | 2.03886 | 4.31421  |
| C    | 2.84133                            | 2.06823 | 2.95619  |
| C    | 1.57574                            | 1.86676 | 2.28671  |
| C    | 0.39649                            | 1.67734 | 2.95624  |
| C    | 0.48716                            | 1.53682 | 4.40943  |
| C    | 1.76157                            | 1.72384 | 5.08405  |
| C    | 4.23526                            | 2.37586 | 4.98268  |
| C    | 4.23118                            | 3.29731 | 6.04328  |
| C    | 5.41198                            | 3.72588 | 6.65108  |
| C    | 6.63398                            | 3.22739 | 6.18508  |
| C    | 6.62837                            | 2.2845  | 5.14756  |
| C    | 5.45828                            | 1.86068 | 4.52657  |
| N    | -0.49791                           | 1.22235 | 5.20481  |
| S    | 0.1576                             | 1.15542 | 6.67531  |
| N    | 1.75701                            | 1.56754 | 6.3778   |
| N    | 7.96857                            | 3.50043 | 6.60506  |
| C    | 8.75956                            | 2.35933 | 6.06947  |
| C    | 8.03718                            | 2.02775 | 4.74516  |
| C    | 10.20139                           | 2.24512 | 5.56233  |
| C    | 10.14558                           | 0.99936 | 4.63242  |
| C    | 8.65235                            | 0.69436 | 4.34896  |
| C    | 8.56255                            | 4.50752 | 7.41184  |
| C    | 7.83798                            | 5.71735 | 7.62372  |
| C    | 8.31894                            | 6.76416 | 8.38881  |
| C    | 9.59992                            | 6.62476 | 8.95833  |
| C    | 10.34236                           | 5.45722 | 8.75207  |
| C    | 9.82892                            | 4.39187 | 7.98452  |
| N    | 10.38411                           | 7.46583 | 9.74433  |
| C    | 11.6119                            | 6.88907 | 10.06346 |
| C    | 11.59631                           | 5.62279 | 9.44583  |
| C    | 12.74857                           | 7.28526 | 10.8049  |
| C    | 13.81946                           | 6.41112 | 10.89751 |
| C    | 13.79369                           | 5.14404 | 10.26999 |
| C    | 12.68901                           | 4.73715 | 9.54204  |
| C    | 9.87261                            | 8.79223 | 10.12282 |
| C    | 10.75292                           | 9.83816 | 10.8161  |
| C    | 10.01612                           | 11.181  | 10.98464 |

|   |          |          |          |
|---|----------|----------|----------|
| C | 10.88846 | 12.25403 | 11.65846 |
| C | 10.14511 | 13.59284 | 11.80796 |
| C | 11.01725 | 14.67146 | 12.46507 |
| C | -0.86123 | 1.46879  | 2.2147   |
| C | -0.95588 | 1.02829  | 0.9054   |
| C | -2.29523 | 0.79324  | 0.51301  |
| C | -3.18062 | 1.07369  | 1.52073  |
| S | -2.43543 | 1.70591  | 2.90755  |
| C | -2.91466 | 0.19245  | -0.74086 |
| C | -4.33943 | 0.16271  | -0.20766 |
| C | -4.48887 | 0.68152  | 1.05804  |
| C | -5.57036 | -0.27175 | -0.74863 |
| C | -6.61611 | -0.09966 | 0.14678  |
| S | -6.08006 | 0.67399  | 1.62195  |
| C | -8.03176 | -0.40524 | -0.00174 |
| C | -8.65041 | -1.11488 | -0.99397 |
| C | -7.94253 | -1.73693 | -2.07579 |
| N | -7.36293 | -2.25667 | -2.96364 |
| C | -2.31095 | -1.21082 | -0.94908 |
| C | -2.7043  | -1.95552 | -2.23636 |
| C | -2.02569 | -3.33593 | -2.31938 |
| C | -2.21738 | -4.01586 | -3.68641 |
| C | -1.48227 | -5.36604 | -3.76404 |
| C | -1.57877 | -6.01231 | -5.15689 |
| C | -0.82723 | -7.35298 | -5.22798 |
| C | -0.89913 | -7.98615 | -6.6245  |
| C | -2.76887 | 1.13547  | -1.94821 |
| C | -3.33968 | 2.55114  | -1.74301 |
| C | -3.18178 | 3.42903  | -2.99873 |
| C | -3.91933 | 4.77336  | -2.86757 |
| C | -3.74947 | 5.66282  | -4.1122  |
| C | -4.58929 | 6.94955  | -4.02527 |
| C | -4.39373 | 7.86417  | -5.24658 |
| C | -5.27588 | 9.11886  | -5.17605 |
| H | 3.71914  | 2.32067  | 2.33855  |
| H | 1.58575  | 1.94067  | 1.18751  |
| H | 3.28132  | 3.73078  | 6.39652  |
| H | 5.3548   | 4.4254   | 7.49692  |
| H | 5.51308  | 1.17863  | 3.66466  |
| H | 8.60702  | 1.54186  | 6.82143  |
| H | 8.26608  | 2.79105  | 3.95835  |
| H | 10.95676 | 2.1      | 6.36577  |
| H | 10.47162 | 3.16207  | 4.98716  |

|   |          |          |          |
|---|----------|----------|----------|
| H | 10.62733 | 0.11501  | 5.11236  |
| H | 10.69562 | 1.20923  | 3.68475  |
| H | 8.44684  | 0.4188   | 3.2905   |
| H | 8.27377  | -0.11721 | 5.01364  |
| H | 6.87182  | 5.8822   | 7.12568  |
| H | 7.73311  | 7.68712  | 8.51544  |
| H | 10.4336  | 3.48325  | 7.88848  |
| H | 12.81649 | 8.25798  | 11.30756 |
| H | 14.71342 | 6.70863  | 11.47055 |
| H | 14.66429 | 4.47391  | 10.36013 |
| H | 12.66712 | 3.75304  | 9.04956  |
| H | 8.97864  | 8.60507  | 10.76528 |
| H | 9.50843  | 9.25505  | 9.17374  |
| H | 11.67238 | 10.00658 | 10.20639 |
| H | 11.04529 | 9.46785  | 11.82682 |
| H | 9.09339  | 11.02188 | 11.59252 |
| H | 9.69295  | 11.55406 | 9.98331  |
| H | 11.81216 | 12.41184 | 11.05208 |
| H | 11.20739 | 11.89332 | 12.66532 |
| H | 9.22494  | 13.44276 | 12.42223 |
| H | 9.81771  | 13.95303 | 10.80308 |
| H | 10.45901 | 15.63114 | 12.56243 |
| H | 11.93169 | 14.87253 | 11.86132 |
| H | 11.33927 | 14.36228 | 13.48571 |
| H | -0.10615 | 0.78781  | 0.25395  |
| H | -5.65319 | -0.68675 | -1.75799 |
| H | -8.67671 | -0.00401 | 0.79987  |
| H | -2.55486 | -1.84707 | -0.06503 |
| H | -1.19938 | -1.1026  | -0.96866 |
| H | -2.3861  | -1.35985 | -3.12386 |
| H | -3.81007 | -2.08106 | -2.29034 |
| H | -2.42605 | -3.99451 | -1.51221 |
| H | -0.93086 | -3.21587 | -2.13602 |
| H | -1.82634 | -3.34314 | -4.48692 |
| H | -3.3058  | -4.16741 | -3.87986 |
| H | -1.90688 | -6.0605  | -3.00047 |
| H | -0.40548 | -5.21316 | -3.512   |
| H | -1.15295 | -5.31422 | -5.91682 |
| H | -2.652   | -6.17405 | -5.41656 |
| H | -1.25847 | -8.06251 | -4.48166 |
| H | 0.24433  | -7.1963  | -4.956   |
| H | -0.3521  | -8.95678 | -6.65127 |
| H | -0.44259 | -7.32055 | -7.39247 |

|    |          |          |          |
|----|----------|----------|----------|
| H  | -1.95392 | -8.18383 | -6.92334 |
| H  | -3.30482 | 0.68676  | -2.81745 |
| H  | -1.68923 | 1.20969  | -2.22014 |
| H  | -2.83254 | 3.05035  | -0.88397 |
| H  | -4.42477 | 2.47866  | -1.49352 |
| H  | -3.58732 | 2.88436  | -3.88477 |
| H  | -2.09718 | 3.61081  | -3.18875 |
| H  | -3.54325 | 5.31838  | -1.96921 |
| H  | -5.00612 | 4.57534  | -2.70616 |
| H  | -4.05424 | 5.09136  | -5.02134 |
| H  | -2.67157 | 5.92675  | -4.23086 |
| H  | -4.315   | 7.50945  | -3.09958 |
| H  | -5.66857 | 6.67659  | -3.94189 |
| H  | -4.63626 | 7.30156  | -6.17988 |
| H  | -3.32279 | 8.17261  | -5.3133  |
| H  | -5.10858 | 9.77565  | -6.06069 |
| H  | -5.05356 | 9.71766  | -4.26334 |
| H  | -6.35694 | 8.85005  | -5.15563 |
| C  | -10.0367 | -1.38687 | -1.37022 |
| O  | -10.5482 | -2.01163 | -2.37311 |
| O  | -10.9011 | -0.8801  | -0.5521  |
| Ti | -12.4223 | -1.48999 | -1.74833 |
| O  | -13.5245 | -1.87821 | -0.34483 |
| O  | -13.1201 | -2.86013 | -2.93235 |
| O  | -13.0299 | 0.00938  | -2.45284 |
| Ti | -15.213  | -1.21763 | -0.49738 |
| Ti | -14.5928 | -2.90186 | -3.84429 |
| Ti | -14.457  | 1.30162  | -2.00666 |
| O  | -16.7707 | -2.21577 | -0.25132 |
| O  | -15.4993 | -1.47241 | -2.31279 |
| O  | -15.1982 | 0.54004  | -0.41932 |
| O  | -14.4396 | -3.98943 | -5.35761 |
| O  | -16.1556 | -3.72407 | -3.0617  |
| O  | -14.4921 | -1.0645  | -4.62646 |
| O  | -13.9226 | 2.81869  | -1.82139 |
| O  | -15.8373 | 1.11192  | -3.38567 |
| Ti | -17.1788 | -2.60072 | -1.98074 |
| Ti | -15.9814 | -3.97598 | -6.30137 |
| Ti | -16.3108 | -0.37328 | -4.12489 |
| H  | -13.7692 | -0.55771 | -4.18948 |
| Ti | -18.0129 | -3.39863 | -4.35368 |
| O  | -18.6377 | -3.65811 | -2.72649 |
| O  | -17.7319 | -1.41643 | -3.33181 |

---

|    |          |          |          |
|----|----------|----------|----------|
| O  | -17.3226 | -4.79094 | -5.47397 |
| O  | -16.6323 | -2.85852 | -7.63248 |
| O  | -16.4582 | -2.46314 | -5.22183 |
| O  | -17.0839 | -0.07956 | -5.81138 |
| O  | -18.9059 | -2.44583 | -5.74717 |
| Ti | -17.554  | -1.64241 | -6.57377 |

---

**Table S5** Maximum absorption wavelengths for dyes using different functionals

|       | LC-WSPBE | WB97XD | CAM-B3LYP | Exp |
|-------|----------|--------|-----------|-----|
| WS-2  | 440      | 484    | 505       | 550 |
| WS-92 | 455      | 507    | 538       | 554 |
| WS-95 | 480      | 522    | 542       | 574 |

**Table S6**HOMO, LUMO and gap energies (in eV) of dyescalculated by DFT

| Dye | HOMO                                                                                | Energy/eV | LUMO                                                                                 | Energy/eV |
|-----|-------------------------------------------------------------------------------------|-----------|--------------------------------------------------------------------------------------|-----------|
| 1   | 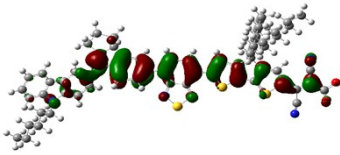   | -5.07     |    | -3.15     |
| 2   |    | -5.15     |    | -3.13     |
| 3   |    | -4.98     |    | -3.09     |
| 4   |    | -4.80     |    | -2.61     |
| 5   |   | -4.86     |   | -2.56     |
| 6   |  | -4.81     |  | -2.73     |
| 7   |  | -5.06     |  | -3.37     |
| 8   |  | -5.06     |  | -3.34     |
| 9   |  | -5.31     |  | -3.35     |

---

|    |                                                                                   |       |                                                                                    |       |
|----|-----------------------------------------------------------------------------------|-------|------------------------------------------------------------------------------------|-------|
| 10 | 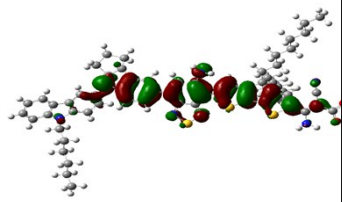 | -4.89 |  | -2.31 |
| 11 |  | -4.86 |  | -2.45 |
| 12 |  | -5.02 |  | -2.57 |



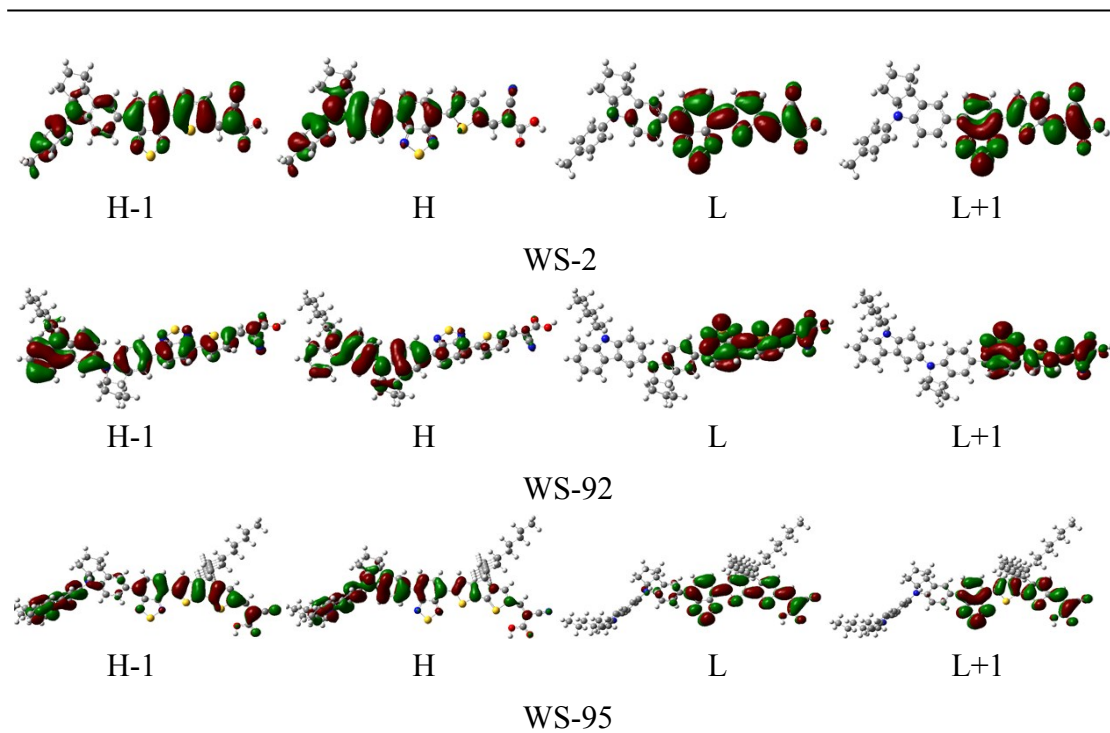

**Figure S1** The plot surface of frontier orbital of the dyes in solvent phase

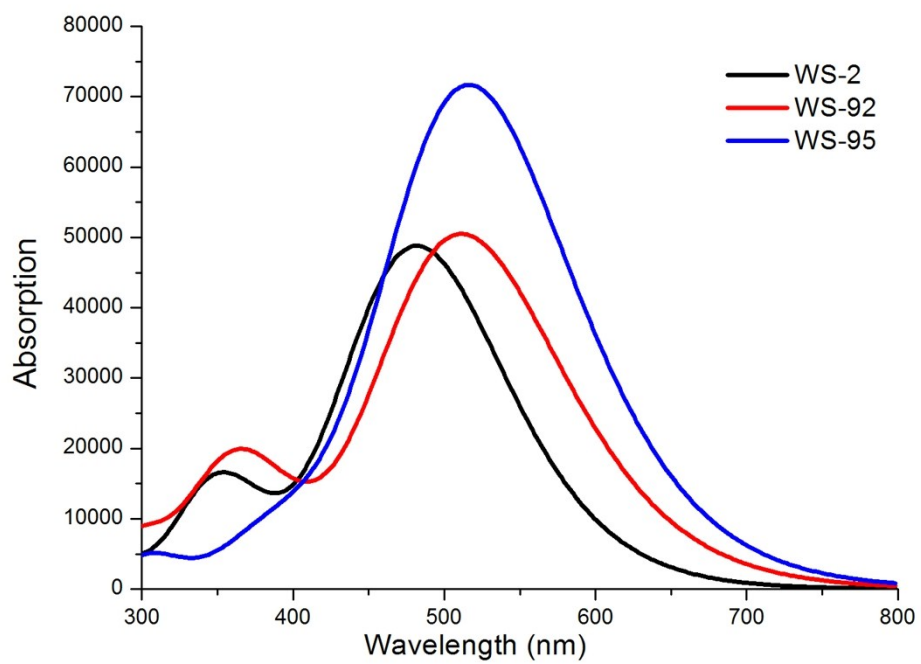

**Figure S2** Absorption spectra of WS-2, WS-92 and WS-95 in gas phase
